# Supplementary material
Source: PubMed Central journal article supplement (PMC7065469)

## **SUPPLEMENTAL FIGURE LEGENDS**

### **Supplemental Figure 1. Cohort Characteristics.**

There was incomplete diagnostic information for the cohort, most notably in laboratory testing for NK cell activity (A). (B) The age distribution for the cohort.

### **Supplemental Figure 2. Relationship between presence of a predicted disruptive germline variant and clinical features.**

Comparison of clinical characteristics and laboratory findings between patients with and without a predicted disruptive (“Pathogenic”) germline variant in the cohort. There were no significant differences found between age (A), gender composition (B), precipitating etiology (C), peak ferritin levels (D), peak soluble interleukin-2 receptor (sIL-2R) levels (E), or sIL-2R:Ferritin ratio.

### **Supplemental Figure 3. Relationship between presence of *PRF1* A91V variant and clinical features.**

Comparison of clinical characteristics and laboratory findings between patients with and without a *PRF1* A91V germline variant in the cohort. There were no significant differences found between age (A), gender composition (B), precipitating etiology (C), peak ferritin levels (D), peak soluble interleukin-2 receptor (sIL-2R) levels (E), or sIL-2R:Ferritin ratio.

Supplemental Figure 1

A

| Test             | Patients with Documented Result (n, % of cohort) |
|------------------|--------------------------------------------------|
| Peak Ferritin    | 87 (99)                                          |
| Peak sIL-2R      | 72 (82)                                          |
| NK Cell Activity | 4 (5)                                            |

B

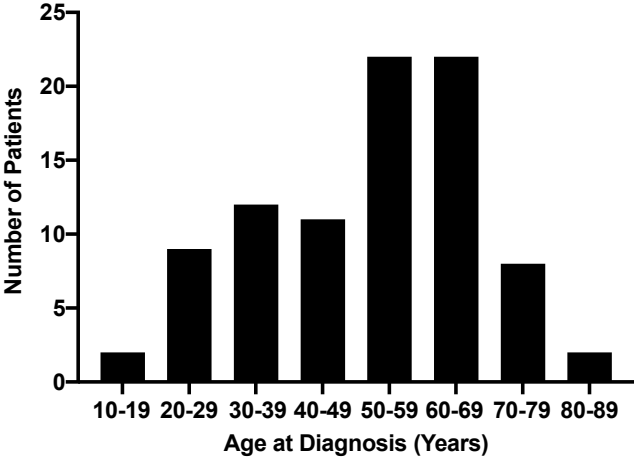

## Supplemental Figure 2

**A**

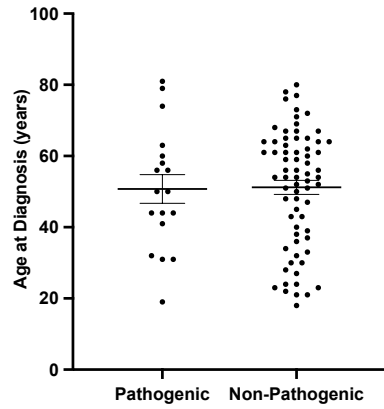

**B**

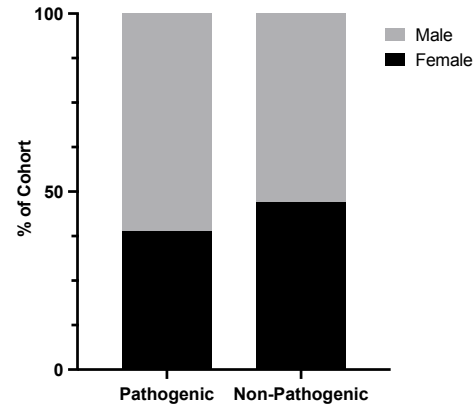

**C**

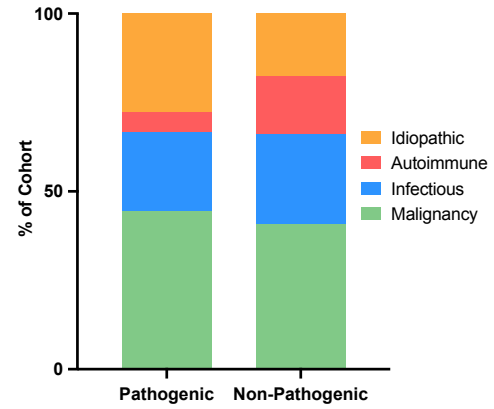

**D**

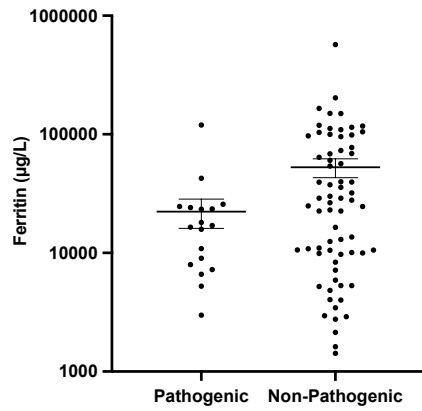

**E**

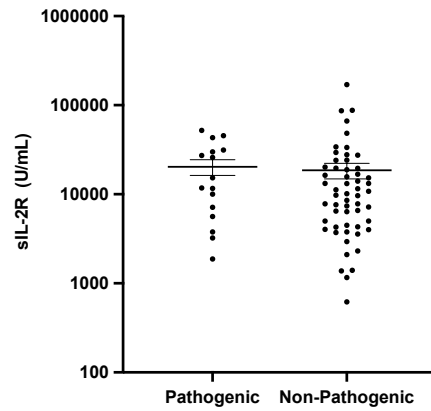

**F**

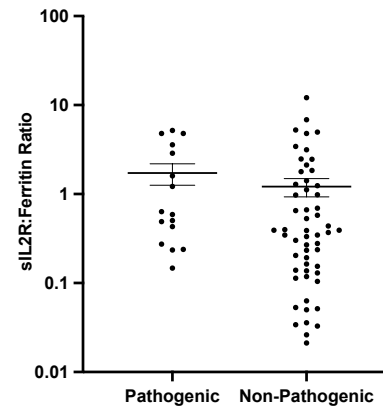

### Supplemental Figure 3

**A**

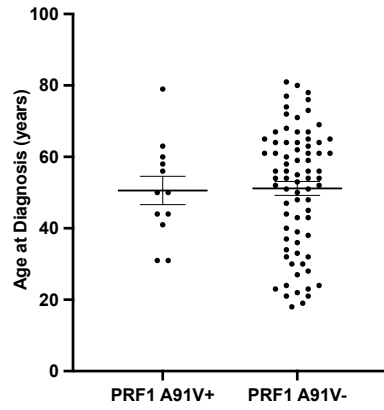

**B**

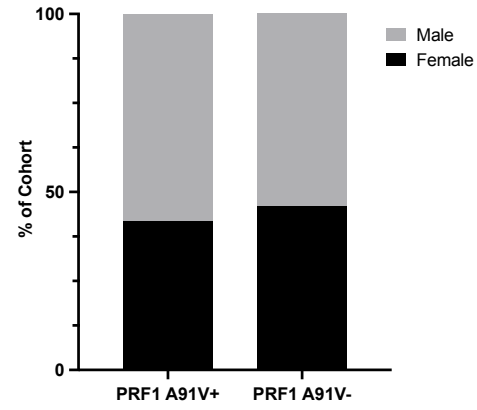

**C**

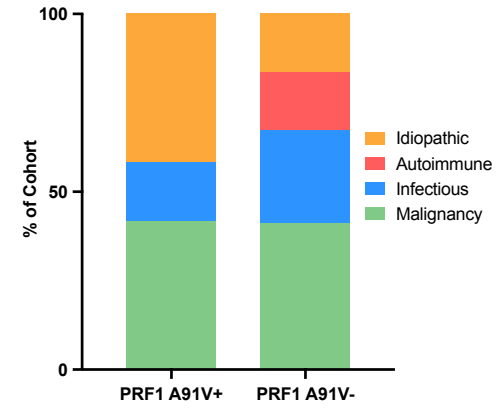

**D**

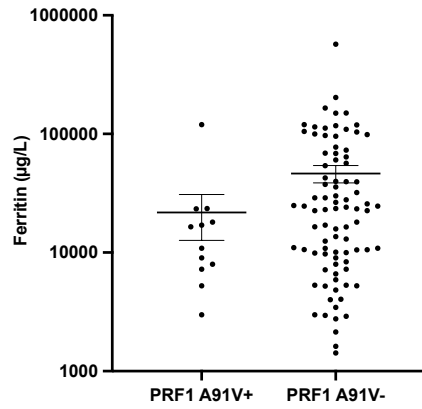

**E**

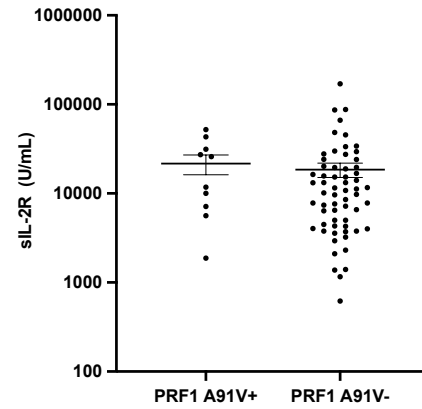

**F**

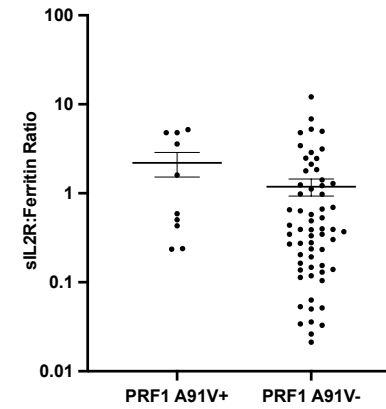

Supplement: baADV2019001272-suppl1.pdf [file baADV2019001272-suppl1.pdf]
